# Supplementary material for: Novel Cytoskeleton-Associated Proteins in Trypanosoma brucei Are Essential for Cell Morphogenesis and Cytokinesis.
Source: MDPI journal article supplement (doi:10.3390/microorganisms9112234), 2021-10-27
Supplement: s1 [file s1]

Supplementary table 1: DNA oligonucleotides used in this study

| Name                          | Purpose, Restriction site                           | Sequence                                |
|-------------------------------|-----------------------------------------------------|-----------------------------------------|
| pHD BirA for                  | BirA* amplification, <i>Ascl</i>                    | ATAGGGCGCGCCGAACAAAACTCATCTCAGAAG       |
| pHD BirA rev                  | BirA* amplification, <i>PacI</i>                    | TATTTAATTAAGTCGAGCTTCTCTCGCTTCTC        |
| CAP5.5ORFfor                  | CAP5.5 ORF amplification, <i>FseI</i>               | ATAGGCCGGCCATGGGTTGTGGTGGATCAAAG        |
| CAP5.5ORFrev                  | CAP5.5 ORF amplification, <i>Ascl</i>               | TATGGCGCGCCCATCACTGTCACTTTCATCAC        |
| Tb927.6.5070_RNAi_for         | CAP52 RNAi, <i>BamHI</i> , <i>HindIII</i>           | ATAGGATCCAAGCTTCTGTTCTTGCAATGAGC        |
| Tb927.6.5070_RNAi_rev         | CAP52 RNAi, <i>XhoI</i> , <i>XbaI</i>               | ATACTCGAGTCTAGAGGAACCTTGAGCCTTC         |
| Tb927.4.1300_RNAi_for         | CAP42 RNAi, <i>BamHI</i> , <i>HindIII</i>           | ATAGGATCCAAGCTTATGTGACTGCTCTGTTTCG      |
| Tb927.4.1300_RNAi_rev         | CAP42 RNAi, <i>XhoI</i> , <i>XbaI</i>               | ATACTCGAGTCTAGATGACAACCATAATGTTG        |
| Tb927.11.2610RNAi2_for        | CAP50 RNAi, <i>BamHI</i> , <i>HindIII</i>           | ATAGGATCCAAGCTTGTACGGAGAAAGAAATCACC     |
| Tb927.11.2610RNAi2_rev        | CAP50 RNAi, <i>XhoI</i> , <i>XbaI</i>               | ATACTCGAGTCTAGACCTGCTGGCGAGGCGGTCAACAGC |
| Tb927.6.5070_ORF_for          | CAP52 ORF amplification, <i>FseI</i>                | ATAGGCCGGCCATGCGAGCAAACCAATTGAGCG       |
| Tb927.6.5070_ORF_rev          | CAP52 ORF amplification, <i>Ascl</i>                | TATGGCGCGCCCATACGCCCTCCACAGTGGACC       |
| Tb927.4.1300_ORF_for          | CAP42 ORF amplification, <i>FseI</i>                | ATAGGCCGGCCATGTCGACTGCTCTGTTCTGTTTC     |
| Tb927.4.1300_ORF_rev          | CAP42 ORF amplification, <i>Ascl</i>                | TATGGCGCGCCCGCAACCGCCGCTTAAATGTC        |
| Tb927.11.2610_ORF_for         | CAP50 ORF and $\Delta C$ amplification, <i>FseI</i> | ATAGGCCGGCCATGGCAGCCGCTGTTACAATTG       |
| Tb927.11.2610_ORF_rev         | CAP50 ORF and $\Delta N$ amplification, <i>Ascl</i> | TATGGCGCGCCCCGACGTGCGTTTCGACTTGGGTG     |
| Tb927.11.2610 $\Delta C$ _rev | CAP50 $\Delta N$ amplification, <i>Ascl</i>         | TATGGCGCGCCCATCAATTTGGTCAAAAGCGATTTCAGC |
| Tb927.11.2610 $\Delta N$ _for | CAP50 $\Delta C$ amplification, <i>FseI</i>         | ATAGGCCGGCCATGCGTAATGGACCCCGCATC        |
| PFRAqPCRf                     | qPCR                                                | CGTTGGAGATGTTTGGACCT                    |
| PFRAqPCRr                     | qPCR                                                | GCACGGTACTCCACCATCTT                    |
| 1300q_for                     | qPCR                                                | CGGTTGGAGGAGGATGCTGG                    |
| 1300q_rev                     | qPCR                                                | GTATTGACATGGAGTCACCGACA                 |
| 5070q_for                     | qPCR                                                | GATTCCAGTGGAGAGCCTGGGAAG                |
| 5070q_rev                     | qPCR                                                | GCTTCCACGCCAATGGTGCG                    |
| Tb927.11.2610qfor             | qPCR                                                | GGAGGTTGAGGAACAGCACG                    |
| Tb927.11.2610qrev             | qPCR                                                | CTCCATCTCGGCGGGCAGTT                    |

## Supplementary Figure 1

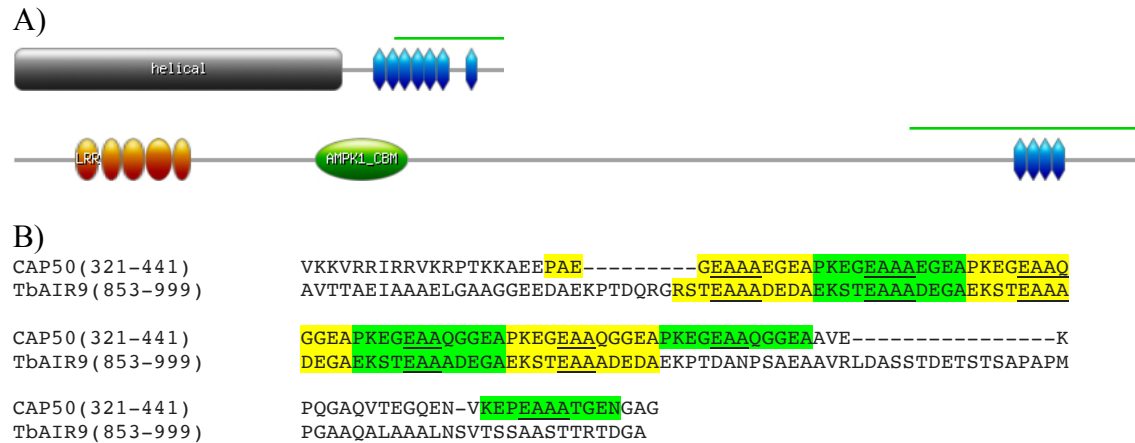

Sequence Analysis of CAP50 and AIR9. A) Domain organization. CAP50 contains a N-terminal  $\alpha$ -helical region (grey box). Several repeats can be detected in the C-terminal, unstructured region (green bar). In AIR9, Leucin-Rich repeats (LRR, orange) and a AMP-activated protein kinase (green) can be identified in the N-terminal region, followed by longer, structured repeats (not shown here). Again, repeats can be identified in the intrinsically unstructured region at the C-terminus. B) Sequence alignment of the two repeat-containing regions of CAP50 and TbAIR9. The individual repeats are highlighted. The common EAAA-motif is underlined.

### Method: Sequence Analysis

NCBI BLAST have been used to identify similarities to other sequences using the UniProt database. Domain analysis were performed, using SMART (Letunic et al. (2020) Nucleic Acids Res doi: 10.1093/nar/gkaa937), prediction of intrinsically unstructured regions using IUPRED2 (Mészáros et al. 2008, doi.org/10.1093/nar/gky384). Repeats have been identified using EMBOSS dotplot (Rice et al 2010, [10.1016/s0168-9525\(00\)02024-2](https://doi.org/10.1016/s0168-9525(00)02024-2)) & HHRepID (Zimmermann, et al. 2018, [doi.org/10.1016/j.jmb.2017.12.007](https://doi.org/10.1016/j.jmb.2017.12.007)).

>CAP52\_Tb927.6.5070  
MRANPI<sup>1</sup>RRKERETALS<sup>2</sup>VRQRELEELR<sup>3</sup>QKAQLGEELGMELSALEGDNLAAAF<sup>4</sup>PVIQYCGSRPKDKAKKIPVESLGSVMN<sup>5</sup>  
QFEIAIKAISQNNRDIEQQITDLNRTIGVEAQRFTKLKRHSKELADATGVSLDPNAVQHLAGKSRDGEDCSGGLKELEET<sup>6</sup>  
TVVLEERKALVEKEIRAARQLVKKKEEAVLAMSSALESRQEEIDQLNRLYNDIRVVDRDIKCEKETLREIISEHDIVDTK<sup>7</sup>  
LNEA<sup>8</sup>IERNVSRTRL<sup>9</sup>LIEQG<sup>10</sup>INEIKTEIADSVSVSRRGQ<sup>11</sup>ERV<sup>12</sup>MKAQEF<sup>13</sup>RIDQLEKRLDCINKALKNNHLTRDVEAIVSHKW<sup>14</sup>  
AAAGDALVAAT<sup>15</sup>PEDESMYDIEAI<sup>16</sup>IP<sup>17</sup>QERCHPAIYNLLTEKERLAR<sup>18</sup>RIISLGI<sup>19</sup>IAKEKVEIDALACKAEALARECQQA<sup>20</sup>I  
QELDHVASAAAYEEMORVEAMEY<sup>21</sup>IO<sup>22</sup>KORLHYS<sup>23</sup>DLFLKEMWKLKTKNOGPI<sup>24</sup>LWRAY<sup>25</sup>

>Tb927.9.11540  
MADVSAADSAQVELERLNDVIDKYTCQVEHIDNLLQEEENNDSVSRQIAEYQSALESHPENIPAEDALEVITRLNT  
LKIVQRRNHLLKENGQTQNRLLERSNVLLNATKTFDHIVDVTGWHDKFLFDAEDLRKSVADIREMSNIEAVVQKELRVA  
QGI IKKKEAALRQLLEELVEQGKEQEAVLNNVYNDIRVKERDCSEVEMQLVRLRKSVAKTDEALAVFDLHNQNASLAYMES  
DRDYLRDSVAEMKSTTRRQDNV IKAQLTRQQQLQTRLDVIMKSLREMKLDDKKYERNIPKSALVPSASREEPEDVSKILPE  
SECIPVPTYRLLHKNNAELRVIMRKNMPLVLEKNAVIEAMLEAGLAKYGSALITTYKEQQDLRQNKMDLIELMDDLQQQH  
SNYLEKLEFELRLQNAALKKKMYRSTROHAPLKGTRPMR

Pairwise alignment of CAP52 with Tb927.9.11540 using EMBOSS Needle ([www.ebi.ac.uk/Tools](http://www.ebi.ac.uk/Tools)). Sequences are 24% identical and 42.2% similar.

### Supplementary Figure 3

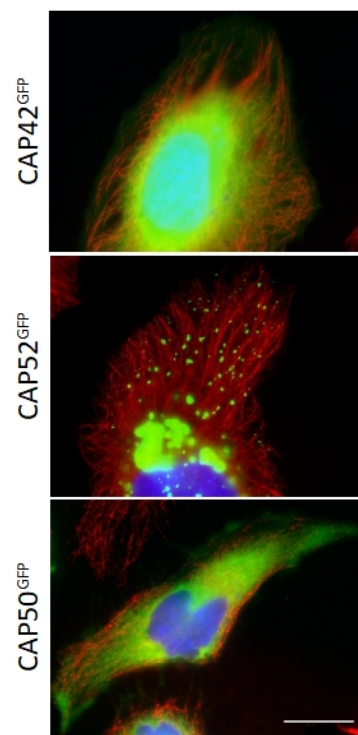

Expression of GFP-tagged CAP42, CAP52 and CAP50 in HeLa cells showed no co-localization of the proteins with mammalian microtubules. Cells were stained with anti-tubulin (red), anti-GFP (green) and the DNA was stained with DAPI. Scale bar = 20  $\mu\text{m}$
